# Supplementary material
Source: Springer Nature journal article supplement (https://www.springermedizin.de/resource/supplementary/12967_2012_1341_MOESM4_ESM.pdf/9573270)
Supplement: MOESM4 [file 9573270]

Table 3a. Statistical analysis of changes in biomarkers at 3 months

| <b>Biomarker</b> | <b>n</b> | <b>Median change * (Q1, Q3)</b> | <b>Wilcoxon p-value</b> | <b>Median fold-change * (Q1, Q3)</b> | <b>Wilcoxon p-value</b> |
|------------------|----------|---------------------------------|-------------------------|--------------------------------------|-------------------------|
| %-ICOS-CD4       | 25       | 13.00 (1.15, 20.69)             | <.0001                  | 1.35 (0.23, 3.62)                    | <.0001                  |
| %-ICOS-CD8       | 25       | 4.19 (2.07, 7.75)               | <.0001                  | 2.90 (1.25, 6.72)                    | <.0001                  |
| %-Ki67-CD4       | 24       | 3.62 (0.74, 6.94)               | <.0001                  | 1.50 (0.18, 2.64)                    | <.0001                  |
| %-Ki67-CD8       | 24       | 1.49 (-0.10, 4.86)              | 0.0009                  | 0.54 (-0.03, 2.20)                   | 0.0003                  |
| %-CCR7-CD8       | 25       | -3.98 (-11.40, 1.30)            | 0.0122                  | -0.14 (-0.27, 0.04)                  | 0.018                   |
| %-CD25-CD8       | 25       | -1.60 (-5.68, -0.70)            | <.0001                  | -0.42 (-0.56, -0.25)                 | <.0001                  |

\*(Q1, Q3) are first and third interquartiles.

Table 3b. Statistical analysis of changes in biomarkers at 6 months

| <b>Biomarker</b> | <b>n</b> | <b>Median change * (Q1, Q3)</b> | <b>Wilcoxon p-value</b> | <b>Median fold-change * (Q1, Q3)</b> | <b>Wilcoxon p-value</b> |
|------------------|----------|---------------------------------|-------------------------|--------------------------------------|-------------------------|
| %-ICOS-CD4       | 37       | 9.45 (3.13, 14.57)              | <.0001                  | 1.66 (0.70, 2.42)                    | <.0001                  |
| %-ICOS-CD8       | 37       | 3.07 (1.62, 5.36)               | <.0001                  | 1.34 (0.63, 3.30)                    | <.0001                  |
| %-Ki67-CD4       | 35       | 2.33 (1.37, 6.97)               | <.0001                  | 0.87 (0.29, 2.12)                    | <.0001                  |
| %-Ki67-CD8       | 36       | 1.88 (0.13, 4.91)               | 0.0004                  | 0.55 (0.04, 1.52)                    | <.0001                  |
| %-Gata3-CD4      | 28       | 3.76 (0.28, 8.04)               | 0.0004                  | 0.94 (-0.01, 1.62)                   | <.0001                  |
| %-Gata3-CD8      | 28       | 2.07 (0.59, 4.02)               | 0.0006                  | 0.59 (0.09, 1.23)                    | <.0001                  |
| %-CCR7-CD4       | 37       | -2.90 (-6.80, -0.40)            | 0.0017                  | -0.03 (-0.09, -0.01)                 | 0.006                   |

\*(Q1, Q3) are first and third interquartiles.
